# Supplementary material
Source: PubMed Central journal article supplement (PMC3664016)
Supplement: NIHMS459620-supplement-supplement_1.pdf [file NIHMS459620-supplement-supplement_1.pdf]

**Table S1.** Inventory for Complicated Grief–Revised for Children (ICG-RC) Scores at Baseline and Follow-Up by ICG-RC Class

|                                     | Class 1                 | Class 2                  | Class 3                  | Between class test statistics |        |            |
|-------------------------------------|-------------------------|--------------------------|--------------------------|-------------------------------|--------|------------|
|                                     |                         |                          |                          | F                             | df     | <i>p</i> * |
| <b>9 months (n=154)</b>             | <b>92</b>               | <b>49</b>                | <b>13</b>                |                               |        |            |
| ICG-RC scores, mean (SD)            | 43.4 (9.7) <sup>a</sup> | 69.2 (16.5) <sup>b</sup> | 86.8 (10.9) <sup>c</sup> | 116.0                         | 2, 151 | <.001      |
| <b>21 months (n=129)</b>            | <b>74</b>               | <b>45</b>                | <b>10</b>                |                               |        |            |
| ICG-RC scores, mean (SD)            | 38.1 (6.9) <sup>a</sup> | 56.9 (8.1) <sup>b</sup>  | 80.5 (10.2) <sup>c</sup> | 184.8                         | 2, 126 | <.001      |
| <b>33 months (n=102)</b>            | <b>63</b>               | <b>33</b>                | <b>6</b>                 |                               |        |            |
| ICG-RC scores, mean (SD)            | 37.7 (8.3) <sup>a</sup> | 53.9 (10.6) <sup>b</sup> | 81.0 (13.7) <sup>c</sup> | 77.8                          | 2, 99  | <.001      |
| <b>Within class test statistics</b> |                         |                          |                          |                               |        |            |
| 9 vs. 21 months                     | t=4.4, df=73, p<.001    | t=4.1, df=44, p<.001     | t=0.8, df=9, p=.47       |                               |        |            |
| 21 vs. 33 months                    | t=-0.1, df=57, p=.91    | t=1.5, df=31, p=.13      | t=0.1, df=5, p=.89       |                               |        |            |

Note: <sup>abc</sup>Represent significant post-hoc group differences at  $\alpha=0.0167$ , i.e., Classes 1, 2, and 3 showed significant pairwise post-hoc differences at 9, 21, and 33 months.

\*Bonferroni-corrected  $\alpha=0.0167$ .

Table S2. Sensitivity and Specificity of Individual Items of the Inventory of Complicated Grief–Revised for Children (ICG-RC) at 21 Months Following Parental Death Comparing Class 3 (Cases) vs. Class 1 (Noncases)

| Item                                                                                                                                                                                                                                  | Freq <sup>a</sup> | Sens <sup>b</sup> | Spec <sup>c</sup> | AUC <sup>d</sup> | <i>p</i> |
|---------------------------------------------------------------------------------------------------------------------------------------------------------------------------------------------------------------------------------------|-------------------|-------------------|-------------------|------------------|----------|
| 1. The death feels upsetting, overwhelming or devastating                                                                                                                                                                             | 4.7               | 0.27              | 1.00              | 0.96             | <.001    |
| 2. I think about .... <sup>e</sup> so much that it can be hard for me to do the things I normally do                                                                                                                                  | 1.2               | 0.10              | 1.00              | 0.79             | .003     |
| 3. Memories of .... upset me                                                                                                                                                                                                          | 2.4               | 0.00              | 0.98              | 0.79             | .004     |
| 4. I feel that I cannot accept the death                                                                                                                                                                                              | 2.4               | 0.20              | 1.00              | 0.89             | <.001    |
| 5. I very much miss ....                                                                                                                                                                                                              | 36.5              | <b>0.90</b>       | 0.76              | 0.88             | <.001    |
| 6. I feel angry about the death                                                                                                                                                                                                       | 4.7               | 0.25              | 0.99              | 0.87             | <.001    |
| 7. I feel that I cannot believe the death                                                                                                                                                                                             | 7.1               | 0.40              | 0.99              | 0.85             | <.001    |
| 8. I feel shocked over the death                                                                                                                                                                                                      | 10.6              | <b>0.55</b>       | 0.99              | 0.92             | <.001    |
| 9. Ever since the death, it is hard for me to trust people                                                                                                                                                                            | 4.7               | 0.35              | 1.00              | 0.89             | <.001    |
| 10. Ever since the death, I feel like I don't care about other people as much and I don't feel as close to people I care about as I used to                                                                                           | 3.5               | 0.20              | 1.00              | 0.91             | <.001    |
| 11. I avoid reminders of ....                                                                                                                                                                                                         | 1.2               | 0.00              | 0.99              | 0.63             | .18      |
| 12. I avoid reminders that he/she is dead                                                                                                                                                                                             | 1.2               | 0.10              | 1.00              | 0.73             | .02      |
| 13. Sometimes people who lose a loved one feel that they cannot go back to normal life and be able to make new friends and do new activities. Do you feel that making new friends or doing new activities would be difficult for you? | 1.2               | 0.07              | 1.00              | 0.82             | .001     |
| 14. I feel that life is empty or has no meaning without ....                                                                                                                                                                          | 2.4               | 0.13              | 1.00              | 0.82             | .001     |
| 15. I hear the voice of....speak to me                                                                                                                                                                                                | 1.2               | 0.00              | 0.99              | 0.64             | .15      |
| 16. I feel like I have become numb ( <i>or has no feelings</i> ) <sup>f</sup> since the death                                                                                                                                         | 4.8               | 0.15              | 0.99              | 0.80             | .002     |
| 17. I feel that it is unfair that I should live when he/she died                                                                                                                                                                      | 2.4               | 0.10              | 0.99              | 0.72             | .03      |
| 18. I am bitter ( <i>or angry</i> ) over the death                                                                                                                                                                                    | 3.5               | 0.15              | 0.99              | 0.98             | <.001    |
| 19. I feel jealous of others who have not lost someone close                                                                                                                                                                          | 4.7               | 0.35              | 1.00              | 0.74             | .02      |
| 20. I feel like the future has no meaning or purpose without ....                                                                                                                                                                     | 0.00              | — <sup>g</sup>    | — <sup>g</sup>    | 0.77             | .006     |
| 21. I feel lonely ever since the death                                                                                                                                                                                                | 8.2               | <b>0.50</b>       | 1.00              | 0.87             | <.001    |
| 22. It is difficult for me to imagine life being satisfying without ....                                                                                                                                                              | 2.4               | 0.15              | 1.00              | 0.88             | <.001    |
| 23. I feel that a part of myself died with ....                                                                                                                                                                                       | 6.0               | 0.40              | 1.00              | 0.97             | <.001    |
| 24. I feel that the death made me see the world differently                                                                                                                                                                           | 10.7              | <b>0.50</b>       | 0.97              | 0.93             | <.001    |
| 25. I don't feel safe since the death                                                                                                                                                                                                 | 3.5               | 0.25              | 1.00              | 0.83             | .001     |
| 26. I feel that I don't have control over things since the death                                                                                                                                                                      | 3.6               | 0.20              | 1.00              | 0.82             | .001     |
| 27. I am jumpy or easily startled since the death                                                                                                                                                                                     | 6.0               | 0.35              | 1.00              | 0.87             | <.001    |
| 28. Since the death, my sleep has been disturbed                                                                                                                                                                                      | 4.8               | 0.20              | 0.99              | 0.67             | .08      |

Note: Shaded items constitute the ICG-RC screen. Numbers in bold in the sensitivity column correspond to sens>0.5.

<sup>a</sup>Freq=Frequency or % endorsing item at  $\geq 4$ .

<sup>b</sup>Sensitivity.

<sup>c</sup>Specificity.

<sup>d</sup>Area under the curve (AUC).

<sup>e</sup>“my parent” or the relationship lost.

<sup>f</sup>Words between parentheses are for the interviewer to use for younger children.

<sup>g</sup>No participant answered “daily” or “several times a day.”

ACCEPTED MANUSCRIPT

Table S3. Sensitivity and Specificity of Individual Items of the Inventory of Complicated Grief–Revised for Children (ICG-RC) at 33 Months Following Parental Death Comparing Class 3 (Cases) vs. Class 1 (Noncases)

| Item                                                                                                                                                                                                                                  | Freq <sup>a</sup> | Sens <sup>b</sup> | Spec <sup>c</sup> | AUC <sup>d</sup> | <i>p</i> |
|---------------------------------------------------------------------------------------------------------------------------------------------------------------------------------------------------------------------------------------|-------------------|-------------------|-------------------|------------------|----------|
| 1. The death feels upsetting, overwhelming or devastating                                                                                                                                                                             | 1.4               | 0.17              | 1.00              | .77              | .03      |
| 2. I think about .... <sup>e</sup> so much that it can be hard for me to do the things I normally do                                                                                                                                  | 1.4               | 0.17              | 1.00              | .89              | .002     |
| 3. Memories of .... upset me                                                                                                                                                                                                          | 0.0               | — <sup>g</sup>    | — <sup>g</sup>    | .88              | .002     |
| 4. I feel that I cannot accept the death                                                                                                                                                                                              | 4.3               | 0.42              | 1.00              | .88              | .002     |
| 5. I very much miss ....                                                                                                                                                                                                              | 26.1              | <b>0.67</b>       | <b>0.85</b>       | .85              | .004     |
| 6. I feel angry about the death                                                                                                                                                                                                       | 5.8               | 0.17              | 0.96              | .81              | .01      |
| 7. I feel that I cannot believe the death                                                                                                                                                                                             | 7.2               | <b>0.50</b>       | 0.98              | .89              | .002     |
| 8. I feel shocked over the death                                                                                                                                                                                                      | 4.3               | 0.42              | 1.00              | .86              | .004     |
| 9. Ever since the death, it is hard for me to trust people                                                                                                                                                                            | 5.8               | 0.42              | 0.99              | .88              | .002     |
| 10. Ever since the death, I feel like I don't care about other people as much and I don't feel as close to people I care about as I used to                                                                                           | 5.8               | 0.17              | 0.98              | .68              | .15      |
| 11. I avoid reminders of ....                                                                                                                                                                                                         | 2.9               | 0.11              | 0.99              | .86              | .003     |
| 12. I avoid reminders that he/she is dead                                                                                                                                                                                             | 4.3               | 0.25              | 0.99              | .87              | .003     |
| 13. Sometimes people who lose a loved one feel that they cannot go back to normal life and be able to make new friends and do new activities. Do you feel that making new friends or doing new activities would be difficult for you? | 1.4               | 0.17              | 1.00              | .85              | .004     |
| 14. I feel that life is empty or has no meaning without ....                                                                                                                                                                          | 0.0               | — <sup>g</sup>    | — <sup>g</sup>    | .81              | .01      |
| 15. I hear the voice of....speak to me                                                                                                                                                                                                | 0.0               | — <sup>g</sup>    | — <sup>g</sup>    | .65              | .23      |
| 16. I feel like I have become numb ( <i>or has no feelings</i> ) <sup>f</sup> since the death                                                                                                                                         | 1.4               | 0.17              | 1.00              | .89              | .002     |
| 17. I feel that it is unfair that I should live when he/she died                                                                                                                                                                      | 1.4               | 0.08              | 1.00              | .66              | .20      |
| 18. I am bitter ( <i>or angry</i> ) <sup>f</sup> over the death                                                                                                                                                                       | 2.9               | 0.11              | 0.99              | .97              | <.001    |
| 19. I feel jealous of others who have not lost someone close                                                                                                                                                                          | 4.3               | 0.42              | 1.00              | .96              | <.001    |
| 20. I feel like the future has no meaning or purpose without ....                                                                                                                                                                     | 0.0               | — <sup>g</sup>    | — <sup>g</sup>    | .64              | .26      |
| 21. I feel lonely ever since the death                                                                                                                                                                                                | 7.2               | 0.25              | 0.98              | .80              | .01      |
| 22. It is difficult for me to imagine life being satisfying without ....                                                                                                                                                              | 0.0               | — <sup>g</sup>    | — <sup>g</sup>    | .72              | .08      |
| 23. I feel that a part of myself died with ....                                                                                                                                                                                       | 5.8               | 0.42              | 1.00              | .90              | .001     |
| 24. I feel that the death made me see the world differently                                                                                                                                                                           | 11.5              | <b>0.58</b>       | 0.96              | .95              | <.001    |
| 25. I don't feel safe since the death                                                                                                                                                                                                 | 1.4               | 0.17              | 1.00              | .86              | .003     |
| 26. I feel that I don't have control over things since the death                                                                                                                                                                      | 4.3               | 0.33              | 1.00              | .81              | .01      |
| 27. I am jumpy or easily startled since the death                                                                                                                                                                                     | 5.8               | 0.33              | 0.99              | .89              | .002     |
| 28. Since the death, my sleep has been disturbed                                                                                                                                                                                      | 7.2               | 0.42              | 0.98              | .77              | .03      |

Note: Shaded items constitute the ICG-RC screen. Numbers in bold in the sensitivity column correspond to sens>0.5.

<sup>a</sup>Freq=Frequency or % endorsing item at  $\geq 4$ .

<sup>b</sup>Sensitivity.

<sup>c</sup>Specificity.

<sup>d</sup>Area under the curve (AUC).

<sup>e</sup>“my parent” or the relationship lost.

<sup>f</sup>Words between parentheses are for the interviewer to use for younger children.

<sup>g</sup>No participant answered “daily” or “several times a day” and thus sensitivity and specificity could not be computed.

ACCEPTED MANUSCRIPT

Table S4. Sensitivity and Specificity of Individual Items of the Inventory of Complicated Grief–Revised for Children (ICG-RC) at 9 Months Following Parental Death Comparing Class 3 (Cases) vs. Class 1 and 2 Combined (Noncases)

| Item                                                                                                                                                                                                                                  | Freq <sup>a</sup> | Sens <sup>b</sup> | Spec <sup>c</sup> | AUC <sup>d</sup> | <i>p</i> |
|---------------------------------------------------------------------------------------------------------------------------------------------------------------------------------------------------------------------------------------|-------------------|-------------------|-------------------|------------------|----------|
| 1. The death feels upsetting, overwhelming or devastating                                                                                                                                                                             | 15.0              | 0.31              | 0.92              | 0.84             | <.001    |
| 2. I think about .... <sup>e</sup> so much that it can be hard for me to do the things I normally do                                                                                                                                  | 10.4              | 0.35              | 0.95              | 0.86             | <.001    |
| 3. Memories of .... upset me                                                                                                                                                                                                          | 14.3              | 0.27              | 0.92              | 0.82             | <.001    |
| 4. I feel that I cannot accept the death                                                                                                                                                                                              | 13.6              | <b>0.57</b>       | 0.89              | 0.82             | <.001    |
| 5. I very much miss ....                                                                                                                                                                                                              | 62.3              | <b>1.00</b>       | 0.63              | 0.85             | <.001    |
| 6. I feel angry about the death                                                                                                                                                                                                       | 19.5              | 0.46              | 0.90              | 0.82             | <.001    |
| 7. I feel that I cannot believe the death                                                                                                                                                                                             | 22.1              | <b>0.62</b>       | 0.89              | 0.84             | <.001    |
| 8. I feel shocked over the death                                                                                                                                                                                                      | 21.7              | <b>0.69</b>       | 0.88              | 0.86             | <.001    |
| 9. Ever since the death, it is hard for me to trust people                                                                                                                                                                            | 8.5               | 0.27              | 0.95              | 0.79             | .001     |
| 10. Ever since the death, I feel like I don't care about other people as much and I don't feel as close to people I care about as I used to                                                                                           | 4.5               | 0.15              | 0.98              | 0.71             | .01      |
| 11. I avoid reminders of ....                                                                                                                                                                                                         | 6.5               | 0.04              | 0.96              | 0.61             | .19      |
| 12. I avoid reminders that he/she is dead                                                                                                                                                                                             | 9.1               | 0.23              | 0.96              | 0.69             | .02      |
| 13. Sometimes people who lose a loved one feel that they cannot go back to normal life and be able to make new friends and do new activities. Do you feel that making new friends or doing new activities would be difficult for you? | 5.9               | 0.19              | 0.98              | 0.83             | <.001    |
| 14. I feel that life is empty or has no meaning without ....                                                                                                                                                                          | 6.5               | 0.15              | 0.97              | 0.72             | .009     |
| 15. I hear the voice of....speak to me                                                                                                                                                                                                | 5.2               | 0.04              | 0.96              | 0.60             | .23      |
| 16. I feel like I have become numb ( <i>or has no feelings</i> ) <sup>f</sup> since the death                                                                                                                                         | 4.6               | 0.15              | 0.98              | 0.74             | .004     |
| 17. I feel that it is unfair that I should live when he/she died                                                                                                                                                                      | 4.6               | 0.08              | 0.98              | 0.66             | .06      |
| 18. I am bitter ( <i>or angry</i> ) over the death                                                                                                                                                                                    | 8.0               | 0.15              | 0.96              | 0.83             | <.001    |
| 19. I feel jealous of others who have not lost someone close                                                                                                                                                                          | 9.2               | 0.42              | 0.97              | 0.75             | .003     |
| 20. I feel like the future has no meaning or purpose without ....                                                                                                                                                                     | 5.3               | 0.00              | 0.96              | 0.70             | .02      |
| 21. I feel lonely ever since the death                                                                                                                                                                                                | 17.5              | 0.42              | 0.92              | 0.77             | .001     |
| 22. It is difficult for me to imagine life being satisfying without ....                                                                                                                                                              | 7.8               | 0.12              | 0.96              | 0.76             | .002     |
| 23. I feel that a part of myself died with ....                                                                                                                                                                                       | 15.0              | 0.42              | 0.93              | 0.80             | <.001    |
| 24. I feel that the death made me see the world differently                                                                                                                                                                           | 24.8              | 0.50              | 0.85              | 0.80             | <.001    |
| 25. I don't feel safe since the death                                                                                                                                                                                                 | 6.5               | 0.19              | 0.97              | 0.66             | .06      |
| 26. I feel that I don't have control over things since the death                                                                                                                                                                      | 7.2               | 0.35              | 0.98              | 0.82             | <.001    |
| 27. I am jumpy or easily startled since the death                                                                                                                                                                                     | 5.9               | 0.08              | 0.97              | 0.81             | <.001    |
| 28. Since the death, my sleep has been disturbed                                                                                                                                                                                      | 7.2               | 0.27              | 0.98              | 0.83             | <.001    |

Note: Shaded items constitute the ICG-RC screen. Numbers in bold in the sensitivity column correspond to sens>0.5.

<sup>a</sup>Freq=Frequency or % endorsing item at  $\geq 4$ .

<sup>b</sup>Sensitivity.

<sup>c</sup>Specificity.

<sup>d</sup>Area under the curve (AUC).

<sup>e</sup>“my parent” or the relationship lost.

<sup>f</sup>Words between parentheses are for the interviewer to use for younger children.

ACCEPTED MANUSCRIPT

Table S5. Sensitivity and Specificity of Individual Items of the Inventory of Complicated Grief–Revised for Children (ICG-RC) at 21 Months Following Parental Death Comparing Class 3 (Cases) vs. Class 1 and 2 Combined (Noncases)

| Item                                                                                                                                                                                                                                  | Freq <sup>a</sup> | Sens <sup>b</sup> | Spec <sup>c</sup> | AUC <sup>d</sup> | P     |
|---------------------------------------------------------------------------------------------------------------------------------------------------------------------------------------------------------------------------------------|-------------------|-------------------|-------------------|------------------|-------|
| 1. The death feels upsetting, overwhelming or devastating                                                                                                                                                                             | 5.4               | 0.20              | 0.98              | 0.91             | <.001 |
| 2. I think about .... <sup>e</sup> so much that it can be hard for me to do the things I normally do                                                                                                                                  | 2.3               | 0.10              | 0.99              | 0.75             | .008  |
| 3. Memories of .... upset me                                                                                                                                                                                                          | 4.6               | 0.00              | 0.97              | 0.70             | .03   |
| 4. I feel that I cannot accept the death                                                                                                                                                                                              | 3.9               | 0.20              | 0.98              | 0.81             | .001  |
| 5. I very much miss ....                                                                                                                                                                                                              | 43.8              | <b>0.90</b>       | 0.66              | 0.82             | .001  |
| 6. I feel angry about the death                                                                                                                                                                                                       | 8.5               | 0.25              | 0.95              | 0.78             | .004  |
| 7. I feel that I cannot believe the death                                                                                                                                                                                             | 14.0              | 0.40              | 0.93              | 0.77             | .004  |
| 8. I feel shocked over the death                                                                                                                                                                                                      | 13.1              | <b>0.55</b>       | 0.95              | 0.88             | <.001 |
| 9. Ever since the death, it is hard for me to trust people                                                                                                                                                                            | 6.9               | 0.35              | 0.97              | 0.81             | .001  |
| 10. Ever since the death, I feel like I don't care about other people as much and I don't feel as close to people I care about as I used to                                                                                           | 4.6               | 0.20              | 0.99              | 0.89             | <.001 |
| 11. I avoid reminders of ....                                                                                                                                                                                                         | 1.5               | 0.00              | 0.99              | 0.59             | .36   |
| 12. I avoid reminders that he/she is dead                                                                                                                                                                                             | 2.3               | 0.10              | 0.99              | 0.66             | .10   |
| 13. Sometimes people who lose a loved one feel that they cannot go back to normal life and be able to make new friends and do new activities. Do you feel that making new friends or doing new activities would be difficult for you? | 2.3               | 0.05              | 0.99              | 0.74             | .01   |
| 14. I feel that life is empty or has no meaning without ....                                                                                                                                                                          | 1.6               | 0.13              | 1.00              | 0.77             | .005  |
| 15. I hear the voice of....speak to me                                                                                                                                                                                                | 1.6               | 0.00              | 0.99              | 0.61             | .24   |
| 16. I feel like I have become numb ( <i>or has no feelings</i> ) <sup>f</sup> since the death                                                                                                                                         | 3.1               | 0.15              | 0.99              | 0.78             | .003  |
| 17. I feel that it is unfair that I should live when he/she died                                                                                                                                                                      | 1.6               | 0.10              | 0.996             | 0.68             | .06   |
| 18. I am bitter ( <i>or angry</i> ) <sup>f</sup> over the death                                                                                                                                                                       | 3.8               | 0.15              | 0.98              | 0.95             | <.001 |
| 19. I feel jealous of others who have not lost someone close                                                                                                                                                                          | 6.2               | 0.35              | 0.98              | 0.70             | .04   |
| 20. I feel like the future has no meaning or purpose without ....                                                                                                                                                                     | 0.8               | 0.00              | 0.995             | 0.70             | .04   |
| 21. I feel lonely ever since the death                                                                                                                                                                                                | 9.2               | 0.50              | 0.98              | 0.85             | <.001 |
| 22. It is difficult for me to imagine life being satisfying without ....                                                                                                                                                              | 3.9               | 0.15              | 0.99              | 0.80             | .002  |
| 23. I feel that a part of myself died with ....                                                                                                                                                                                       | 7.8               | 0.40              | 0.98              | 0.90             | <.001 |
| 24. I feel that the death made me see the world differently                                                                                                                                                                           | 13.2              | 0.50              | 0.94              | 0.88             | <.001 |
| 25. I don't feel safe since the death                                                                                                                                                                                                 | 3.1               | 0.25              | 0.996             | 0.80             | .002  |
| 26. I feel that I don't have control over things since the death                                                                                                                                                                      | 3.9               | 0.20              | 0.99              | 0.77             | .005  |
| 27. I am jumpy or easily startled since the death                                                                                                                                                                                     | 3.9               | 0.35              | 1.00              | 0.86             | <.001 |
| 28. Since the death, my sleep has been disturbed                                                                                                                                                                                      | 5.4               | 0.20              | 0.98              | 0.63             | .17   |

Note: Shaded items constitute the ICG-RC screen. Numbers in bold in the sensitivity column correspond to sens>0.5.

<sup>a</sup>Freq=Frequency or % endorsing item at  $\geq 4$ .

<sup>b</sup>Sensitivity.

<sup>c</sup>Specificity.

<sup>d</sup>Area under the curve (AUC).



<sup>e</sup>“my parent” or the relationship lost.

<sup>f</sup>Words between parentheses are for the interviewer to use for younger children.

ACCEPTED MANUSCRIPT

Table S6. Sensitivity and Specificity of Individual Items of the Inventory of Complicated Grief–Revised for Children (ICG-RC) at 33 Months Following Parental Death Comparing Class 3 (Cases) vs. Class 1 and 2 Combined (Noncases)

| Item                                                                                                                                                                                                                                  | Freq <sup>a</sup> | Sens <sup>b</sup> | Spec <sup>c</sup> | AUC <sup>d</sup> | <i>p</i> |
|---------------------------------------------------------------------------------------------------------------------------------------------------------------------------------------------------------------------------------------|-------------------|-------------------|-------------------|------------------|----------|
| 1. The death feels upsetting, overwhelming, or devastating                                                                                                                                                                            | 2.0               | 0.17              | 0.995             | 0.72             | .08      |
| 2. I think about .... <sup>e</sup> so much that it can be hard for me to do the things I normally do                                                                                                                                  | 1.0               | 0.17              | 1.00              | 0.84             | .005     |
| 3. Memories of .... upset me                                                                                                                                                                                                          | 2.9               | 0.00              | 0.98              | 0.77             | .03      |
| 4. I feel that I cannot accept the death                                                                                                                                                                                              | 4.9               | 0.42              | 0.99              | 0.84             | .006     |
| 5. I very much miss ....                                                                                                                                                                                                              | 29.4              | <b>0.67</b>       | 0.80              | 0.81             | .01      |
| 6. I feel angry about the death                                                                                                                                                                                                       | 8.8               | 0.17              | 0.93              | 0.74             | .05      |
| 7. I feel that I cannot believe the death                                                                                                                                                                                             | 7.8               | 0.50              | 0.96              | 0.85             | .004     |
| 8. I feel shocked over the death                                                                                                                                                                                                      | 5.9               | 0.42              | 0.97              | 0.80             | .02      |
| 9. Ever since the death, it is hard for me to trust people                                                                                                                                                                            | 4.9               | 0.42              | 0.99              | 0.85             | .004     |
| 10. Ever since the death, I feel like I don't care about other people as much and I don't feel as close to people I care about as I used to                                                                                           | 4.9               | 0.17              | 0.98              | 0.64             | .25      |
| 11. I avoid reminders of ....                                                                                                                                                                                                         | 2.0               | 0.11              | 0.99              | 0.83             | .007     |
| 12. I avoid reminders that he/she is dead                                                                                                                                                                                             | 3.9               | 0.17              | 0.99              | 0.85             | .005     |
| 13. Sometimes people who lose a loved one feel that they cannot go back to normal life and be able to make new friends and do new activities. Do you feel that making new friends or doing new activities would be difficult for you? | 2.0               | 0.17              | 0.99              | 0.82             | .009     |
| 14. I feel that life is empty or has no meaning without ....                                                                                                                                                                          | 0.0               | — <sup>g</sup>    | — <sup>g</sup>    | 0.76             | .04      |
| 15. I hear the voice of....speak to me                                                                                                                                                                                                | 0.0               | — <sup>g</sup>    | — <sup>g</sup>    | 0.61             | .36      |
| 16. I feel like I have become numb ( <i>or has no feelings</i> ) <sup>f</sup> since the death                                                                                                                                         | 2.0               | 0.17              | 0.995             | 0.84             | .005     |
| 17. I feel that it is unfair that I should live when he/she died                                                                                                                                                                      | 1.0               | 0.11              | 1.00              | 0.64             | .27      |
| 18. I am bitter ( <i>or angry</i> ) <sup>f</sup> over the death                                                                                                                                                                       | 2.0               | 0.11              | 0.99              | 0.95             | <.001    |
| 19. I feel jealous of others who have not lost someone close                                                                                                                                                                          | 2.9               | 0.42              | 1.00              | 0.93             | <.001    |
| 20. I feel like the future has no meaning or purpose without ....                                                                                                                                                                     | 0.0               | — <sup>g</sup>    | — <sup>g</sup>    | 0.60             | .41      |
| 21. I feel lonely ever since the death                                                                                                                                                                                                | 6.9               | 0.25              | 0.97              | 0.78             | .02      |
| 22. It is difficult for me to imagine life being satisfying without ....                                                                                                                                                              | 0.0               | — <sup>g</sup>    | — <sup>g</sup>    | 0.67             | .16      |
| 23. I feel that a part of myself died with ....                                                                                                                                                                                       | 6.9               | 0.42              | 0.97              | 0.86             | .003     |
| 24. I feel that the death made me see the world differently                                                                                                                                                                           | 16.7              | <b>0.58</b>       | 0.92              | 0.91             | .001     |
| 25. I don't feel safe since the death                                                                                                                                                                                                 | 2.0               | 0.17              | 0.995             | 0.82             | .008     |
| 26. I feel that I don't have control over things since the death                                                                                                                                                                      | 3.9               | 0.33              | 0.995             | 0.77             | .03      |
| 27. I am jumpy or easily startled since the death                                                                                                                                                                                     | 3.9               | 0.33              | 0.995             | 0.87             | .002     |
| 28. Since the death, my sleep has been disturbed                                                                                                                                                                                      | 4.9               | 0.42              | 0.99              | 0.76             | .04      |

Note: Shaded items constitute the ICG-RC screen. Numbers in bold in the sensitivity column correspond to sens>0.5. All items in the ICG-RC Screen had high specificity (> 0.85) at 9, 21, and 33 months (Tables S4–S6, available online) except for very much missing the deceased (item 5), with specificity of 0.63 at 9 months, which increased significantly at 21 (spec=0.66, *p* <0.001) and 33 months (spec=0.80, *p* < 0.001).

<sup>a</sup>Freq=Frequency or % endorsing item at ≥ 4.

<sup>b</sup>Sensitivity.

<sup>c</sup>Specificity.

<sup>d</sup>Area under the curve.

<sup>e</sup>“my parent” or the relationship lost.

<sup>f</sup>Words between parentheses are for the interviewer to use for younger children.

<sup>g</sup>No participant answered “daily” or “several times a day” and thus sensitivity and specificity could not be computed.

ACCEPTED MANUSCRIPT

**Table S7.** Evaluation of Proposed *DSM-5* criteria for Persistent Complex Bereavement-Related Disorder Using Inventory of Complicated Grief–Revised for Children (ICG-RC) Score  $\geq 68$  to Determine “Caseness”

| <b>9 months after the death</b>  | <b>Sensitivity<sup>a</sup></b> | <b>Specificity<sup>a</sup></b> | <b>Sensitivity<sup>b</sup></b> | <b>Specificity<sup>b</sup></b> |
|----------------------------------|--------------------------------|--------------------------------|--------------------------------|--------------------------------|
| Overall Criteria                 | 0.305<br>(11/36)               | 1.000<br>(101/101)             | 0.444<br>(16/36)               | 0.970<br>(98/101)              |
| Criterion                        |                                |                                |                                |                                |
| B                                | 0.974<br>(38/39)               | 0.431<br>(47/109)              |                                |                                |
| C                                | 0.444<br>(16/36)               | 1.000<br>(104/104)             | 0.944<br>(34/36)               | 0.904<br>(94/104)              |
| D <sup>c</sup>                   | 0.500<br>(20/40)               | 0.752<br>(85/113)              |                                |                                |
| <b>21 months after the death</b> |                                |                                |                                |                                |
| Overall Criteria                 | 0.154<br>(2/13)                | 1.000<br>(111/111)             | 0.308<br>(4/13)                | 0.982<br>(109/111)             |
| Criterion                        |                                |                                |                                |                                |
| B                                | 0.786<br>(11/14)               | 0.561<br>(64/114)              |                                |                                |
| C                                | 0.154<br>(2/13)                | 1.000<br>(113/113)             | 0.846<br>(11/13)               | 0.858<br>(97/113)              |
| D <sup>c</sup>                   | 0.571<br>(8/14)                | 0.728<br>(83/114)              |                                |                                |
| <b>33 months after the death</b> |                                |                                |                                |                                |
| Overall Criteria                 | 0.143<br>(1/7)                 | 1.000<br>(87/87)               | 0.286<br>(2/7)                 | 0.977<br>(85/87)               |
| Criterion                        |                                |                                |                                |                                |
| B                                | 0.625<br>(5/8)                 | 0.670<br>(63/94)               |                                |                                |
| C                                | 0.286<br>(2/7)                 | 1.000<br>(91/91)               | 0.857<br>(6/7)                 | 0.956<br>(87/91)               |
| D <sup>c</sup>                   | 0.750<br>(6/8)                 | 0.652<br>(58/89)               |                                |                                |

Note: <sup>a</sup>Criterion C, at least 6 items endorsed.

<sup>b</sup>Criterion C, at least 2 items endorsed.

<sup>c</sup>Criterion D or functional impairment is measured by the Children’s Global Assessment Scale (CGAS)  $\leq 70$ .
